# Supplementary material
Source: PubMed Central journal article supplement (PMC7676424)
Supplement: izaa103_suppl_supplementary_figure_s2.pdf [file izaa103_suppl_supplementary_figure_s2.pdf]

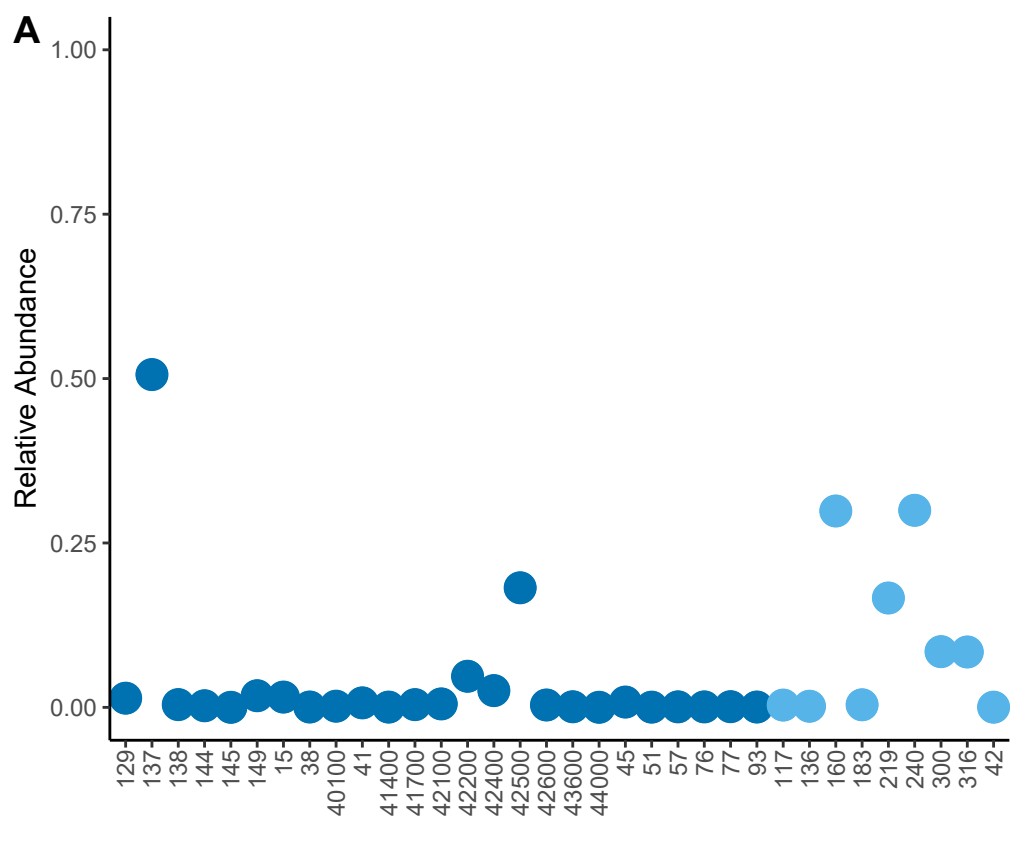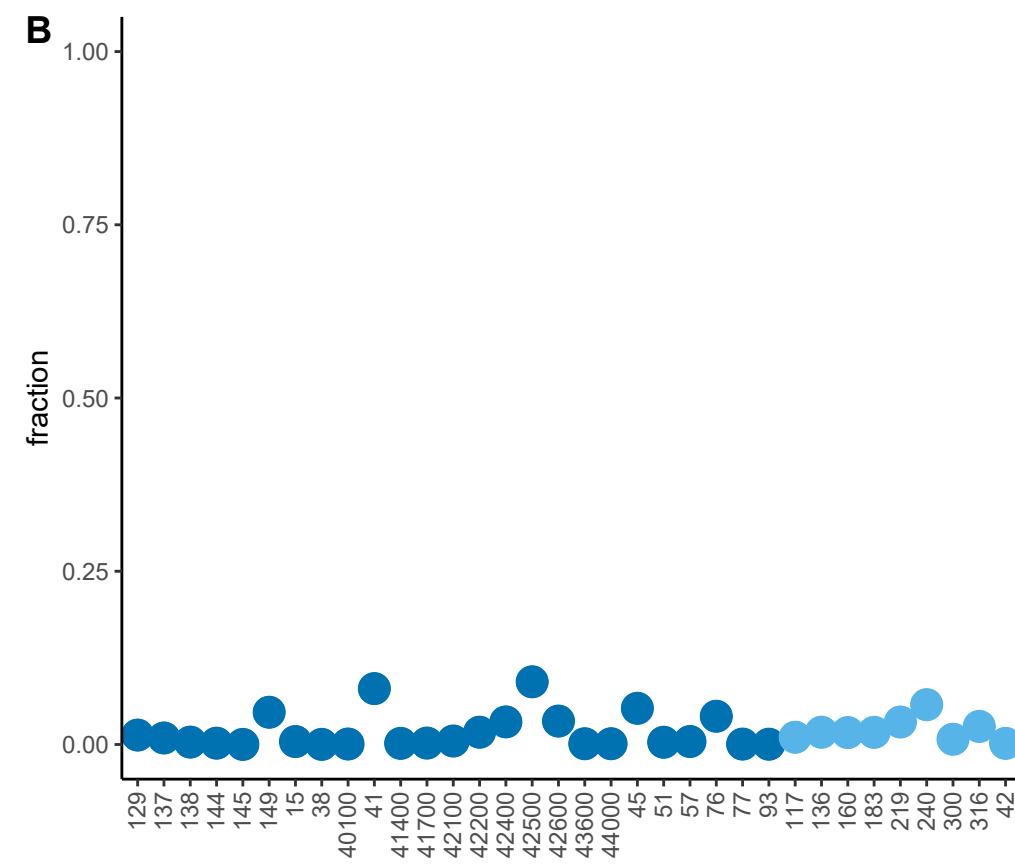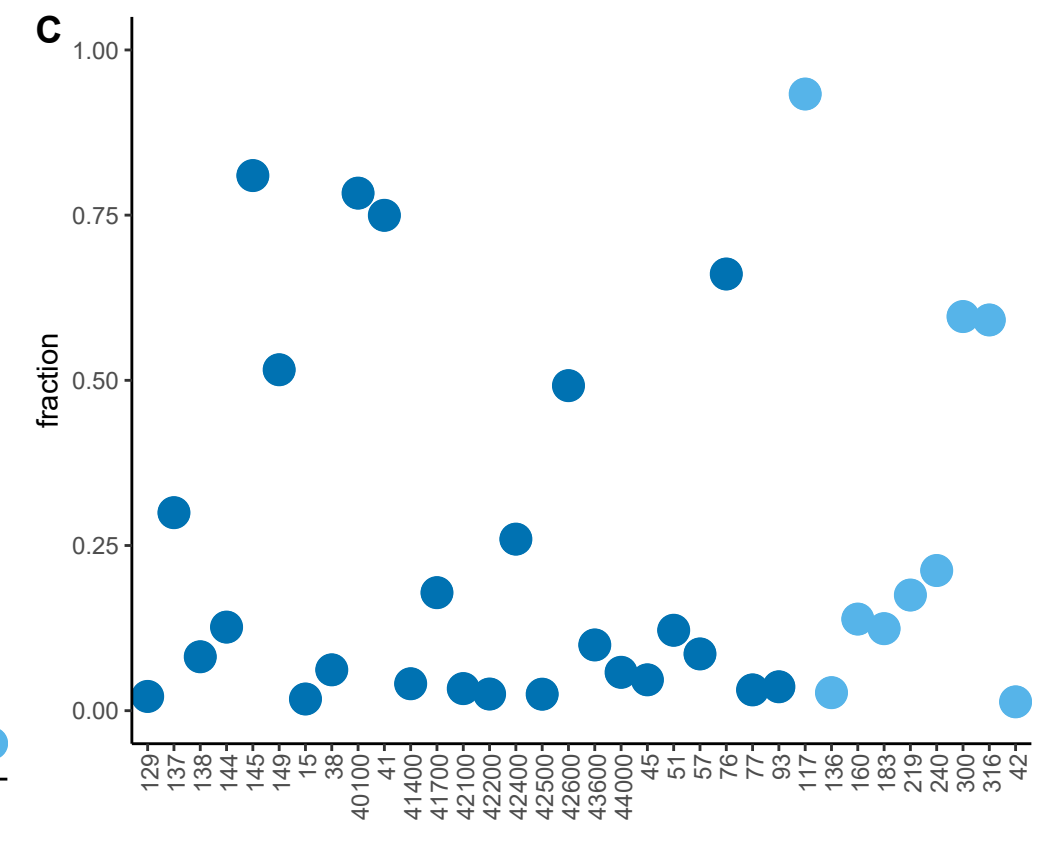

Figure S2

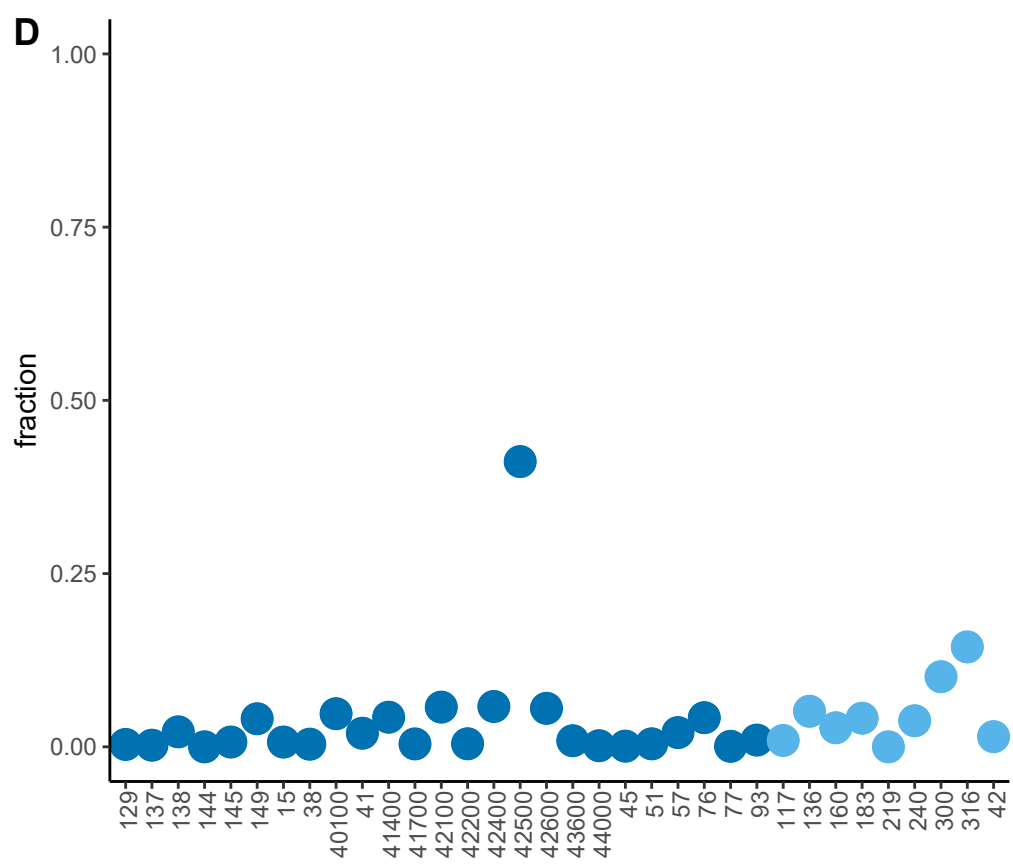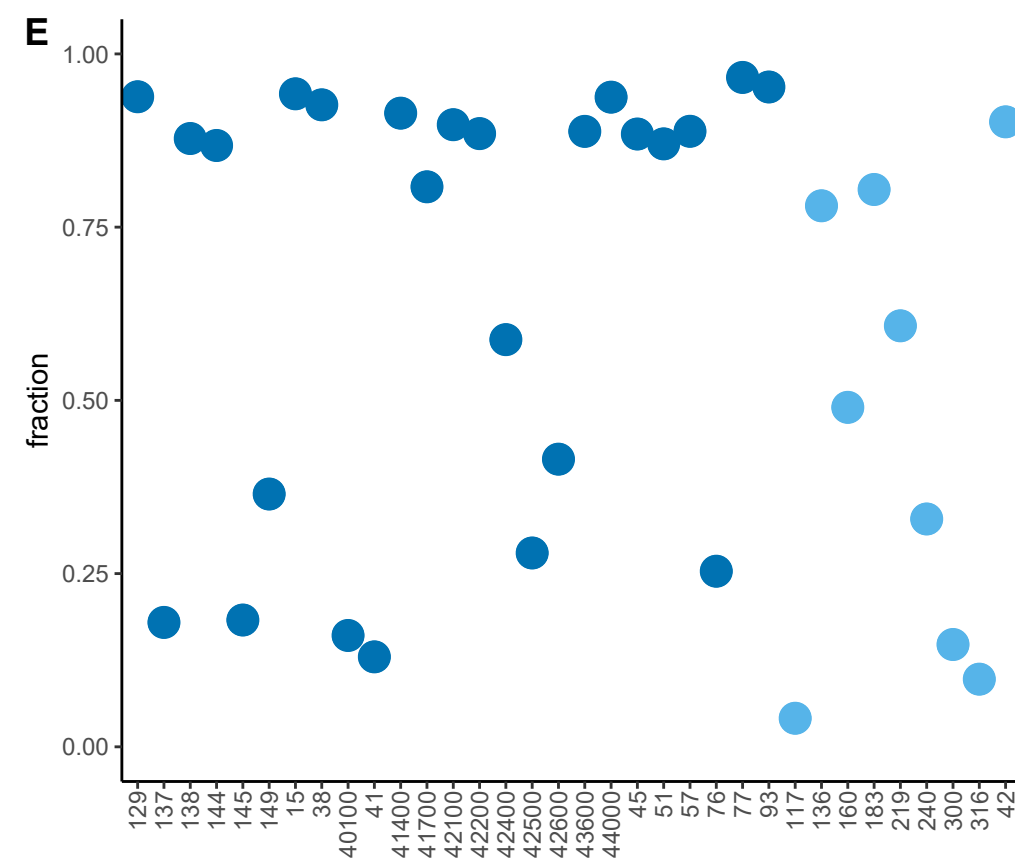

**Supplemental Figure 2. Individual aerotolerance profiles in the colonic mucosa.** Scatterplots of ileal mucosa of nonIBD (light blue) and CD (dark blue) and the relative abundances of taxa classified as obligate aerobes (A), aerobes (B), facultative anaerobes and microaerophiles (C), anaerobes (D), and obligate anaerobes (E)

Figure S3

**Aerotolerance Profiles in Ileal Mucosa**
