# Supplementary material
Source: PubMed Central journal article supplement (PMC7676424)

Supplemental Figure 1

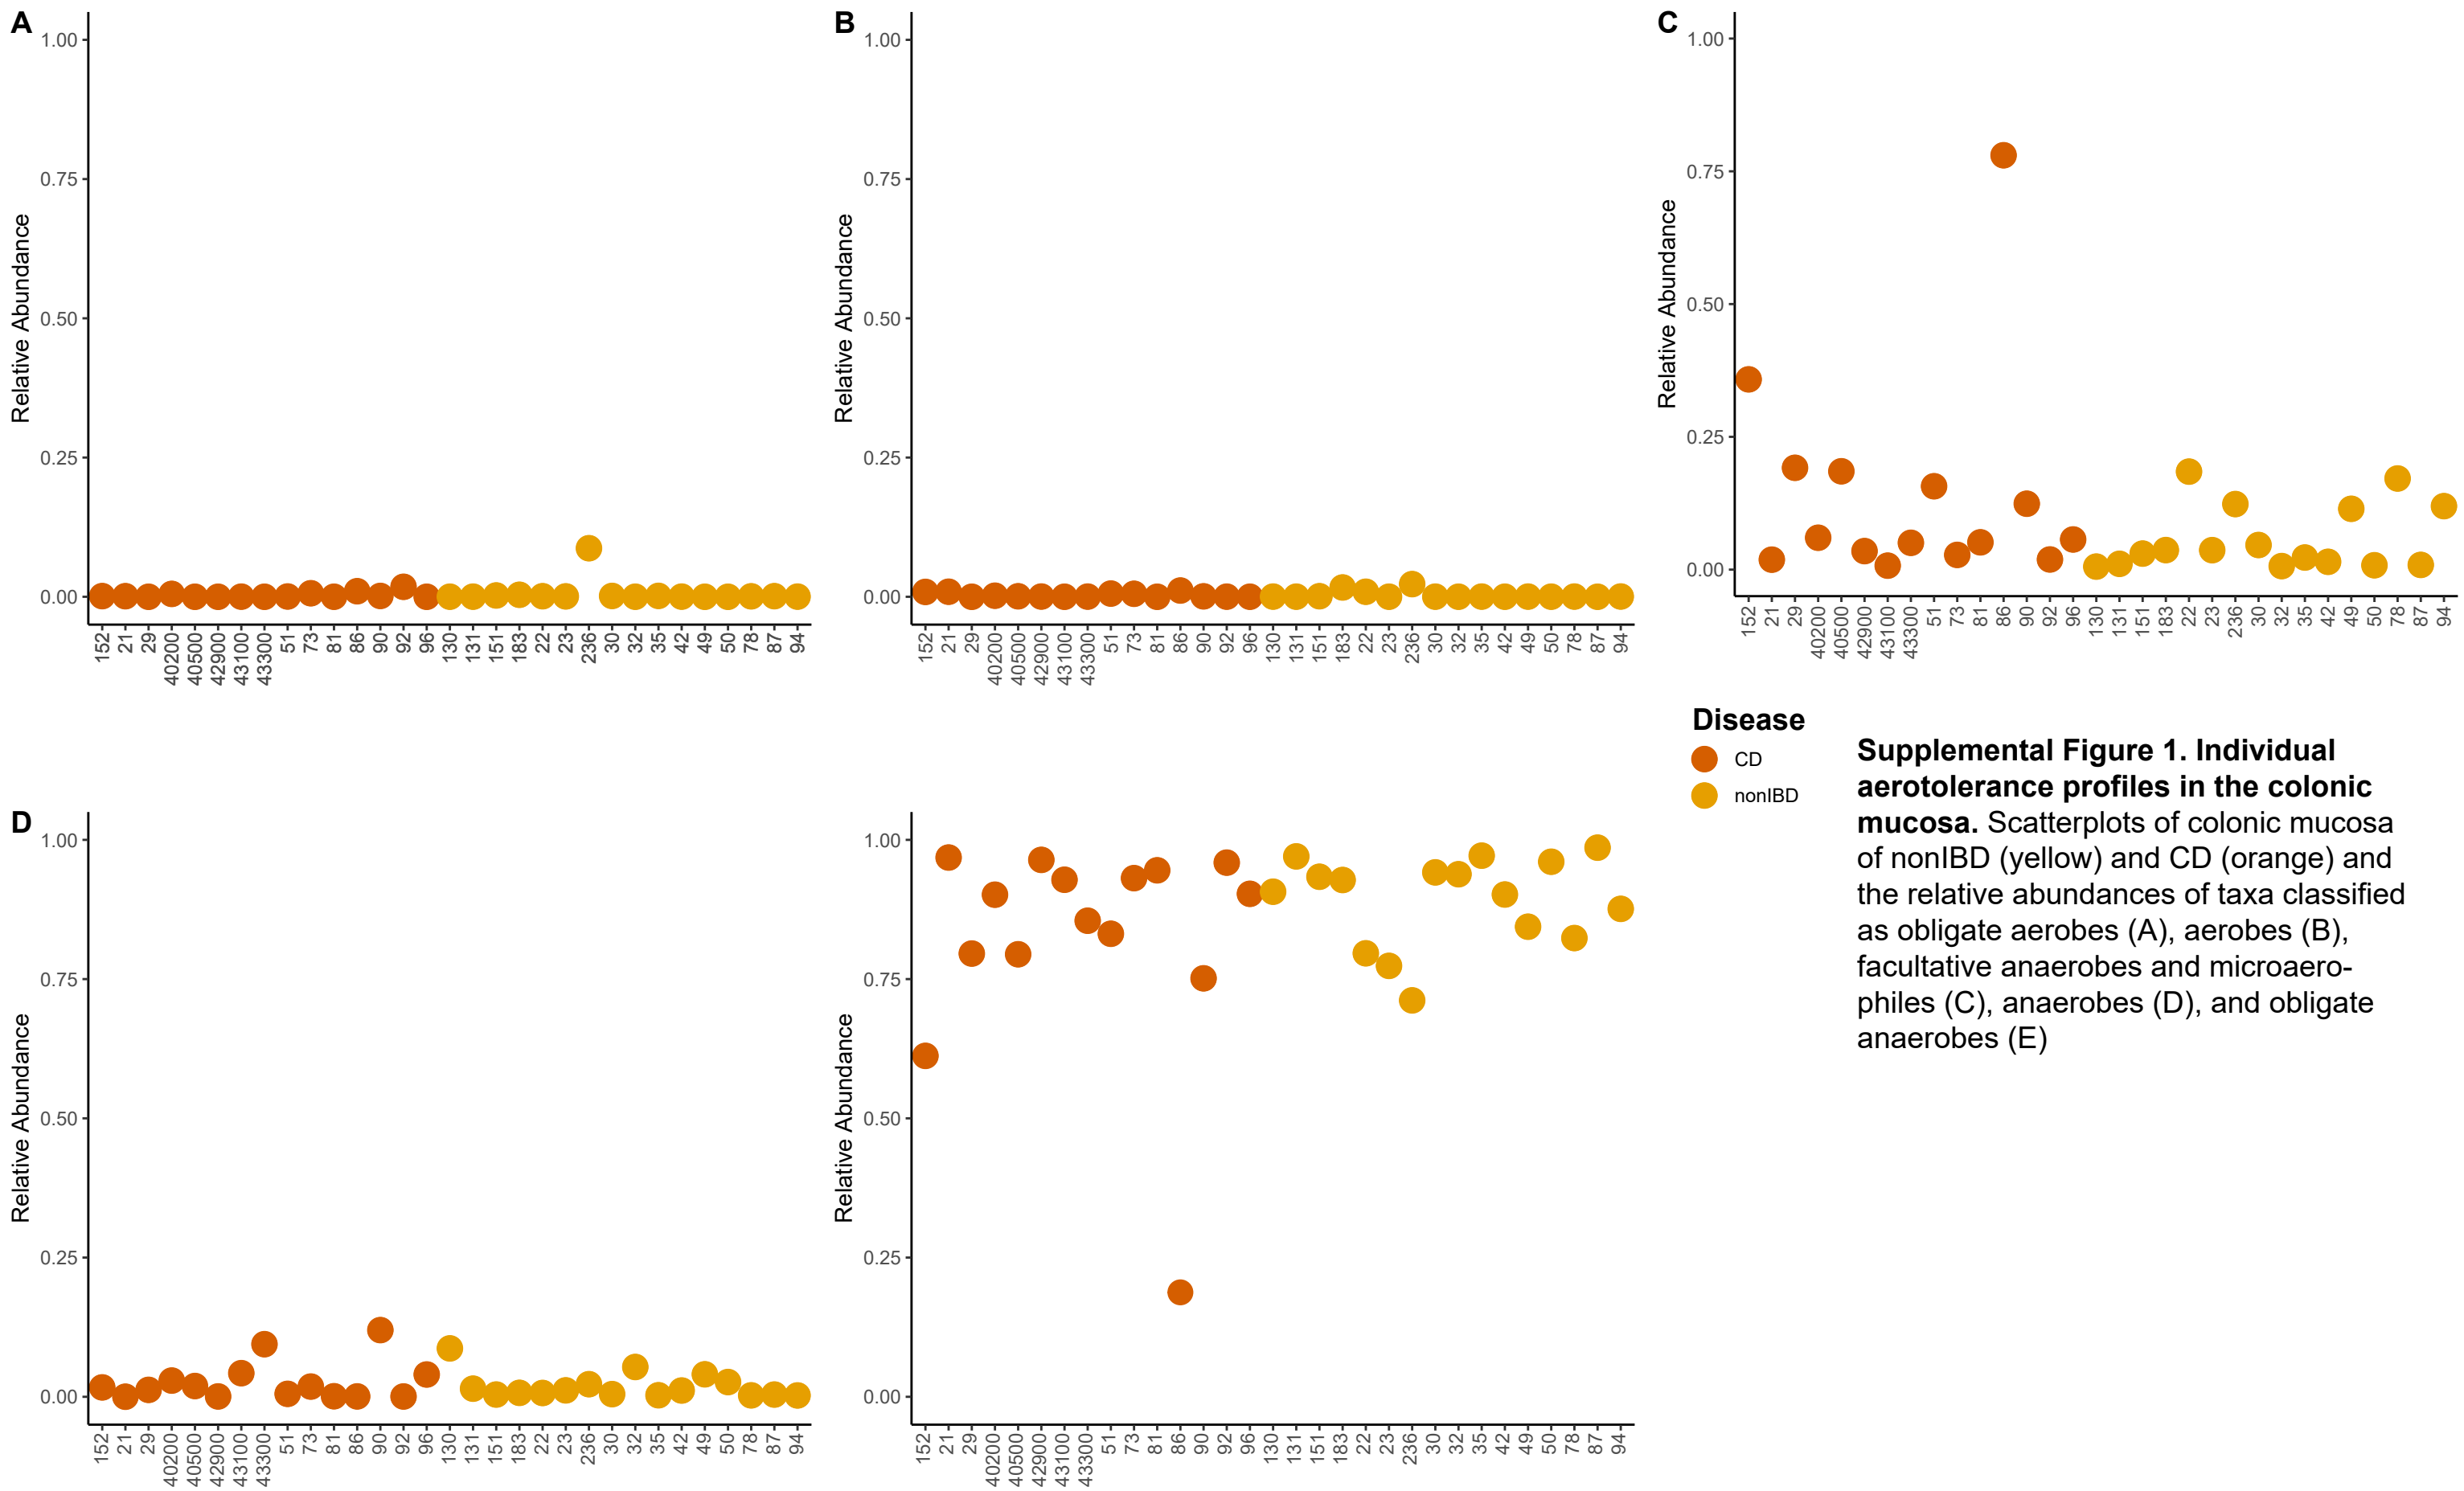

Supplement: izaa103_suppl_supplementary_figure_s1.pdf [file izaa103_suppl_supplementary_figure_s1.pdf]
